# Supplementary material for: Electrospun nanofibrils embedded hydrogel composites for cell cultivation in a biomimetic environment
Source: Royal Society of Chemistry journal article supplement (doi:10.1039/c7ra08595h), 2017-01-01
Supplement: c7ra08595h1.pdf [file c7ra08595h1.pdf]

## **Supplementary information**

### **Electrospun nanofibrils embedded hydrogel composites for cell cultivation in biomimetic environment**

Sol Lee, Hye Sung Kim and Hyunk Sang Yoo

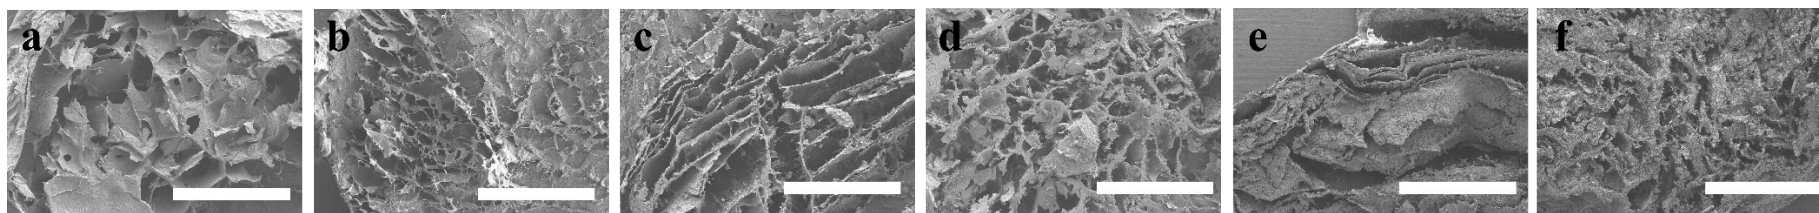

**Figure S1.** Scanning electron microscopic image of NF/Hydrogels. (a) is Hydrogel without NF and (b) ~ (f) indicate 1 ~ 20% NF/Hydrogel.

Scale bar = 1mm.

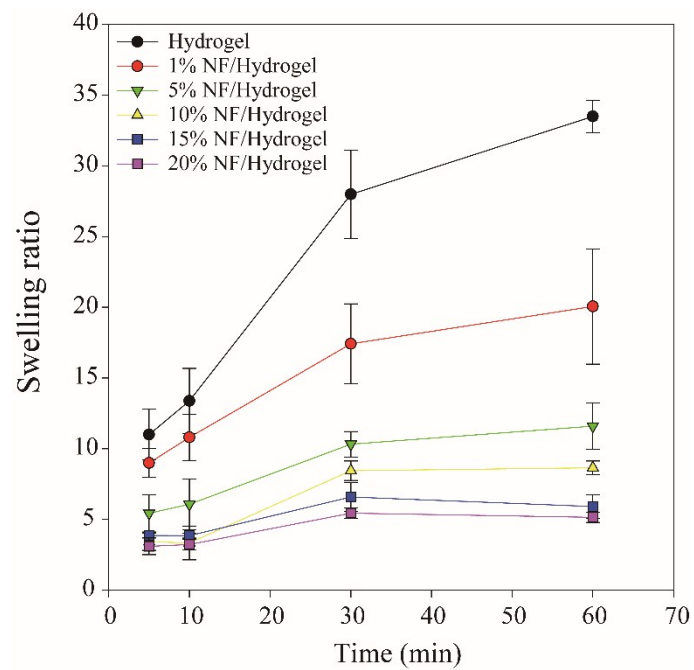

**Figure S2.** Swelling ratios of Hydrogel without NF and NF/Hydrogel.
